# Supplementary material
Source: HighWire-hosted journal article supplement (https://erj.ersjournals.com/content/58/5/2100002)
Supplement: inline-supplementary-material-2 [file inline-supplementary-material-2.pdf]

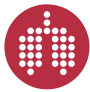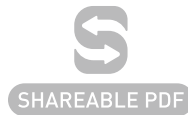

# Dyspnoea and respiratory muscle ultrasound to predict extubation failure

Martin Dres <sup>1,2,3,4</sup>, Thomas Similowski <sup>1,2</sup>, Ewan C. Goligher <sup>4,5</sup>, Tai Pham <sup>3,6,7</sup>, Liliya Sergenyuk <sup>1</sup>, Irene Telias <sup>3,4,5</sup>, Domenico Luca Grieco <sup>3,8,9</sup>, Wissale Ouechani <sup>1</sup>, Detajin Junhasavasdikul <sup>3,10</sup>, Michael C. Sklar <sup>3,4</sup>, L. Felipe Damiani <sup>3,11</sup>, Luana Melo <sup>3</sup>, Cesar Santis <sup>3,12,13</sup>, Lauriane Degravi <sup>1</sup>, Maxens Decavèle <sup>1,2</sup>, Laurent Brochard <sup>3,4</sup> and Alexandre Demoule <sup>1,2</sup>

<sup>1</sup>AP-HP, Groupe Hospitalier Universitaire, AP-HP, Sorbonne Université, Site Pitié-Salpêtrière, Service de Pneumologie, Médecine Intensive Réanimation (Département R3S), Paris, France. <sup>2</sup>Sorbonne Université, INSERM, UMR\_S\_1158 Neurophysiologie Respiratoire Expérimentale et Clinique, Paris, France. <sup>3</sup>Keenan Research Centre, Li Ka Shing Knowledge Institute, St Michael's Hospital, Toronto, ON, Canada. <sup>4</sup>Interdepartmental Division of Critical Care Medicine, University of Toronto, Toronto, ON, Canada. <sup>5</sup>Division of Respiriology, Dept of Medicine, University Health Network, Toronto, ON, Canada. <sup>6</sup>Hôpital Bicêtre, Service de Médecine Intensive – Réanimation, Hôpitaux Universitaires Paris-Saclay, Le Kremlin-Bicêtre, France. <sup>7</sup>Équipe d'Épidémiologie Respiratoire Intégrative, Centre for Epidemiology and Population Health (CESP), Université Paris-Saclay, UVSQ, Université Paris-Sud, INSERM, Villejuif, France. <sup>8</sup>Dept of Emergency, Intensive Care Medicine and Anaesthesia, Fondazione Policlinico Universitario A. Gemelli IRCCS, Rome, Italy. <sup>9</sup>Dept of Anaesthesiology and Intensive Care Medicine, Catholic University of The Sacred Heart, Rome, Italy. <sup>10</sup>Dept of Medicine, Faculty of Medicine Ramathibodi Hospital, Mahidol University, Bangkok, Thailand. <sup>11</sup>Carrera de Kinesiología, Departamento Ciencias de la Salud, Facultad de Medicina, Pontificia Universidad Católica de Chile, Santiago, Chile. <sup>12</sup>Departamento de Medicina Interna, Universidad de Chile, Campus Sur, San Miguel, Chile. <sup>13</sup>Unidad de Pacientes Críticos, Hospital Barros Luco Trudeau, Santiago, Chile.

Corresponding author: Martin Dres ([martin.dres@aphp.fr](mailto:martin.dres@aphp.fr))

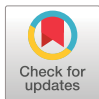

Shareable abstract (@ERSpublications)

**Respiratory muscle ultrasound and dyspnoea intensity early after extubation predict extubation failure** <https://bit.ly/39Uqo9o>

**Cite this article as:** Dres M, Similowski T, Goligher EC, *et al.* Dyspnoea and respiratory muscle ultrasound to predict extubation failure. *Eur Respir J* 2021; 58: 2100002 [DOI: 10.1183/13993003.00002-2021].

This single-page version can be shared freely online.

## Abstract

**Background** This study investigated dyspnoea intensity and respiratory muscle ultrasound early after extubation to predict extubation failure.

**Methods** The study was conducted prospectively in two intensive care units in France and Canada. Patients intubated for at least 48 h were studied within 2 h after an extubation following a successful spontaneous breathing trial. Dyspnoea was evaluated by a dyspnoea visual analogue scale (Dyspnoea-VAS) ranging from 0 to 10 and the Intensive Care Respiratory Distress Observational Scale (IC-RDOS). The ultrasound thickening fraction of the parasternal intercostal and the diaphragm was measured; limb muscle strength was evaluated using the Medical Research Council (MRC) score (range 0–60).

**Results** Extubation failure occurred in 21 out of 122 enrolled patients (17%). The median (interquartile range (IQR)) Dyspnoea-VAS and IC-RDOS were higher in patients with extubation failure *versus* success: 7 (4–9) *versus* 3 (1–5) ( $p < 0.001$ ) and 3.7 (1.8–5.8) *versus* 1.7 (1.5–2.1) ( $p < 0.001$ ), respectively. The median (IQR) ratio of parasternal intercostal muscle to diaphragm thickening fraction was significantly higher and MRC was lower in patients with extubation failure compared with extubation success: 0.9 (0.4–2.1) *versus* 0.3 (0.2–0.5) ( $p < 0.001$ ) and 45 (36–50) *versus* 52 (44–60) ( $p = 0.012$ ), respectively. The thickening fraction of the parasternal intercostal and its ratio to diaphragm thickening showed the highest area under the receiver operating characteristic curve (AUC) for an early prediction of extubation failure (0.81). AUCs of Dyspnoea-VAS and IC-RDOS reached 0.78 and 0.74, respectively.

**Conclusions** Respiratory muscle ultrasound and dyspnoea measured within 2 h after extubation predict subsequent extubation failure.

Copyright ©The authors 2021. For reproduction rights and permissions contact [permissions@ersnet.org](mailto:permissions@ersnet.org)

This article has supplementary material available from [erj.ersjournals.com](http://erj.ersjournals.com)

Received: 3 Jan 2021  
Accepted: 30 March 2021
